# Supplementary material for: A Strategy towards Light-Absorbing Coatings Based on Optically Black Nanoporous Alumina with Tailored Disorder
Source: MDPI journal article supplement (doi:10.3390/ma14195827), 2021-10-05
Supplement: s1 [file s1]

# A Strategy towards Light-Absorbing Coatings Based on Optically Black Nanoporous Alumina with Tailored Disorder

Mikhail Pashchanka <sup>1,\*</sup> and Gennady Cherkashinin <sup>2</sup>

<sup>1</sup> Department of Chemistry, Eduard-Zintl-Institute, Technical University of Darmstadt, Alarich-Weiss-Straße 12, 64287 Darmstadt, Germany

<sup>2</sup> Institute of Materials Science, Technical University of Darmstadt, Alarich-Weiss Straße 2, 64287 Darmstadt, Germany; gennady.cherkashinin@tu-darmstadt.de

\* Correspondence: mikhail.pashchanka@gmail.com

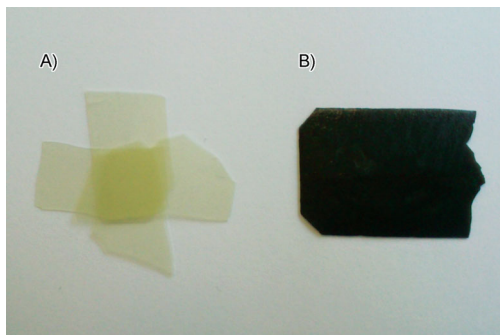

**Figure S1.** Comparison of the visual properties of (A) – stacked translucent porous alumina (a single layer thickness  $\approx 70 \mu\text{m}$ ) and (B) – black opaque alumina of the equivalent layer thickness (280-300  $\mu\text{m}$ ).

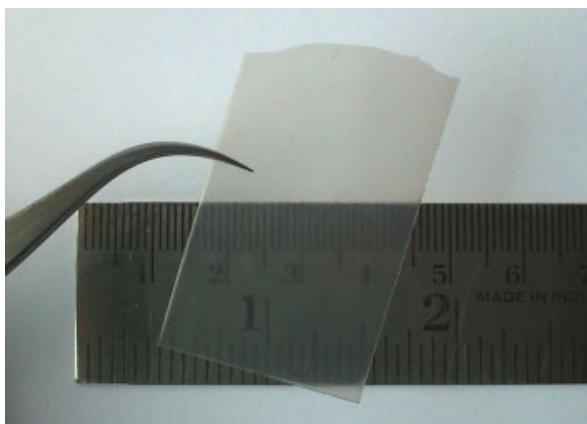

**Figure S2:** A photograph of the highly ordered and transparent PAA obtained from 0.3 M  $\text{H}_2\text{SO}_4$  at  $\Delta U = 27 \text{ V}$ .

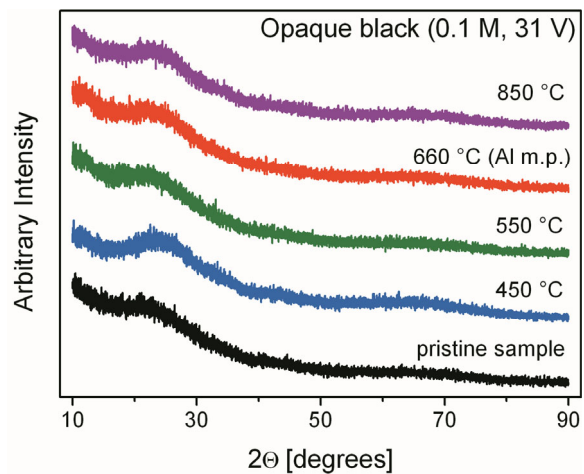

**Figure S3:** The XRD characterization of the thermally cured black opaque anodic alumina samples.

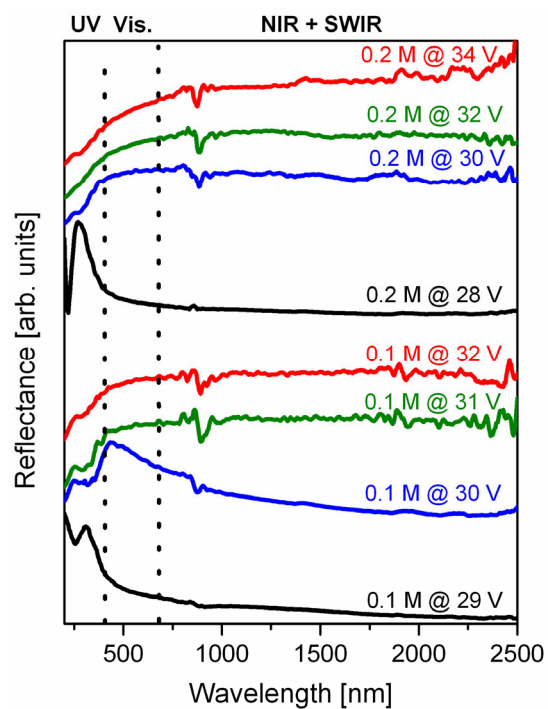

**Figure S4:** UV/Vis/NIR spectrometry results for PAA and b-PAA samples, which cover the UV, visible, near infrared (NIR) and short-wavelength infrared (SWIR) regions.
